# Supplementary material for: A New Highly Conserved Antibiotic Sensing/Resistance Pathway in Firmicutes Involves an ABC Transporter Interplaying with a Signal Transduction System
Source: PubMed Central journal article supplement (PMC3023708; doi:10.1371/journal.pone.0015951), 2011-01-19

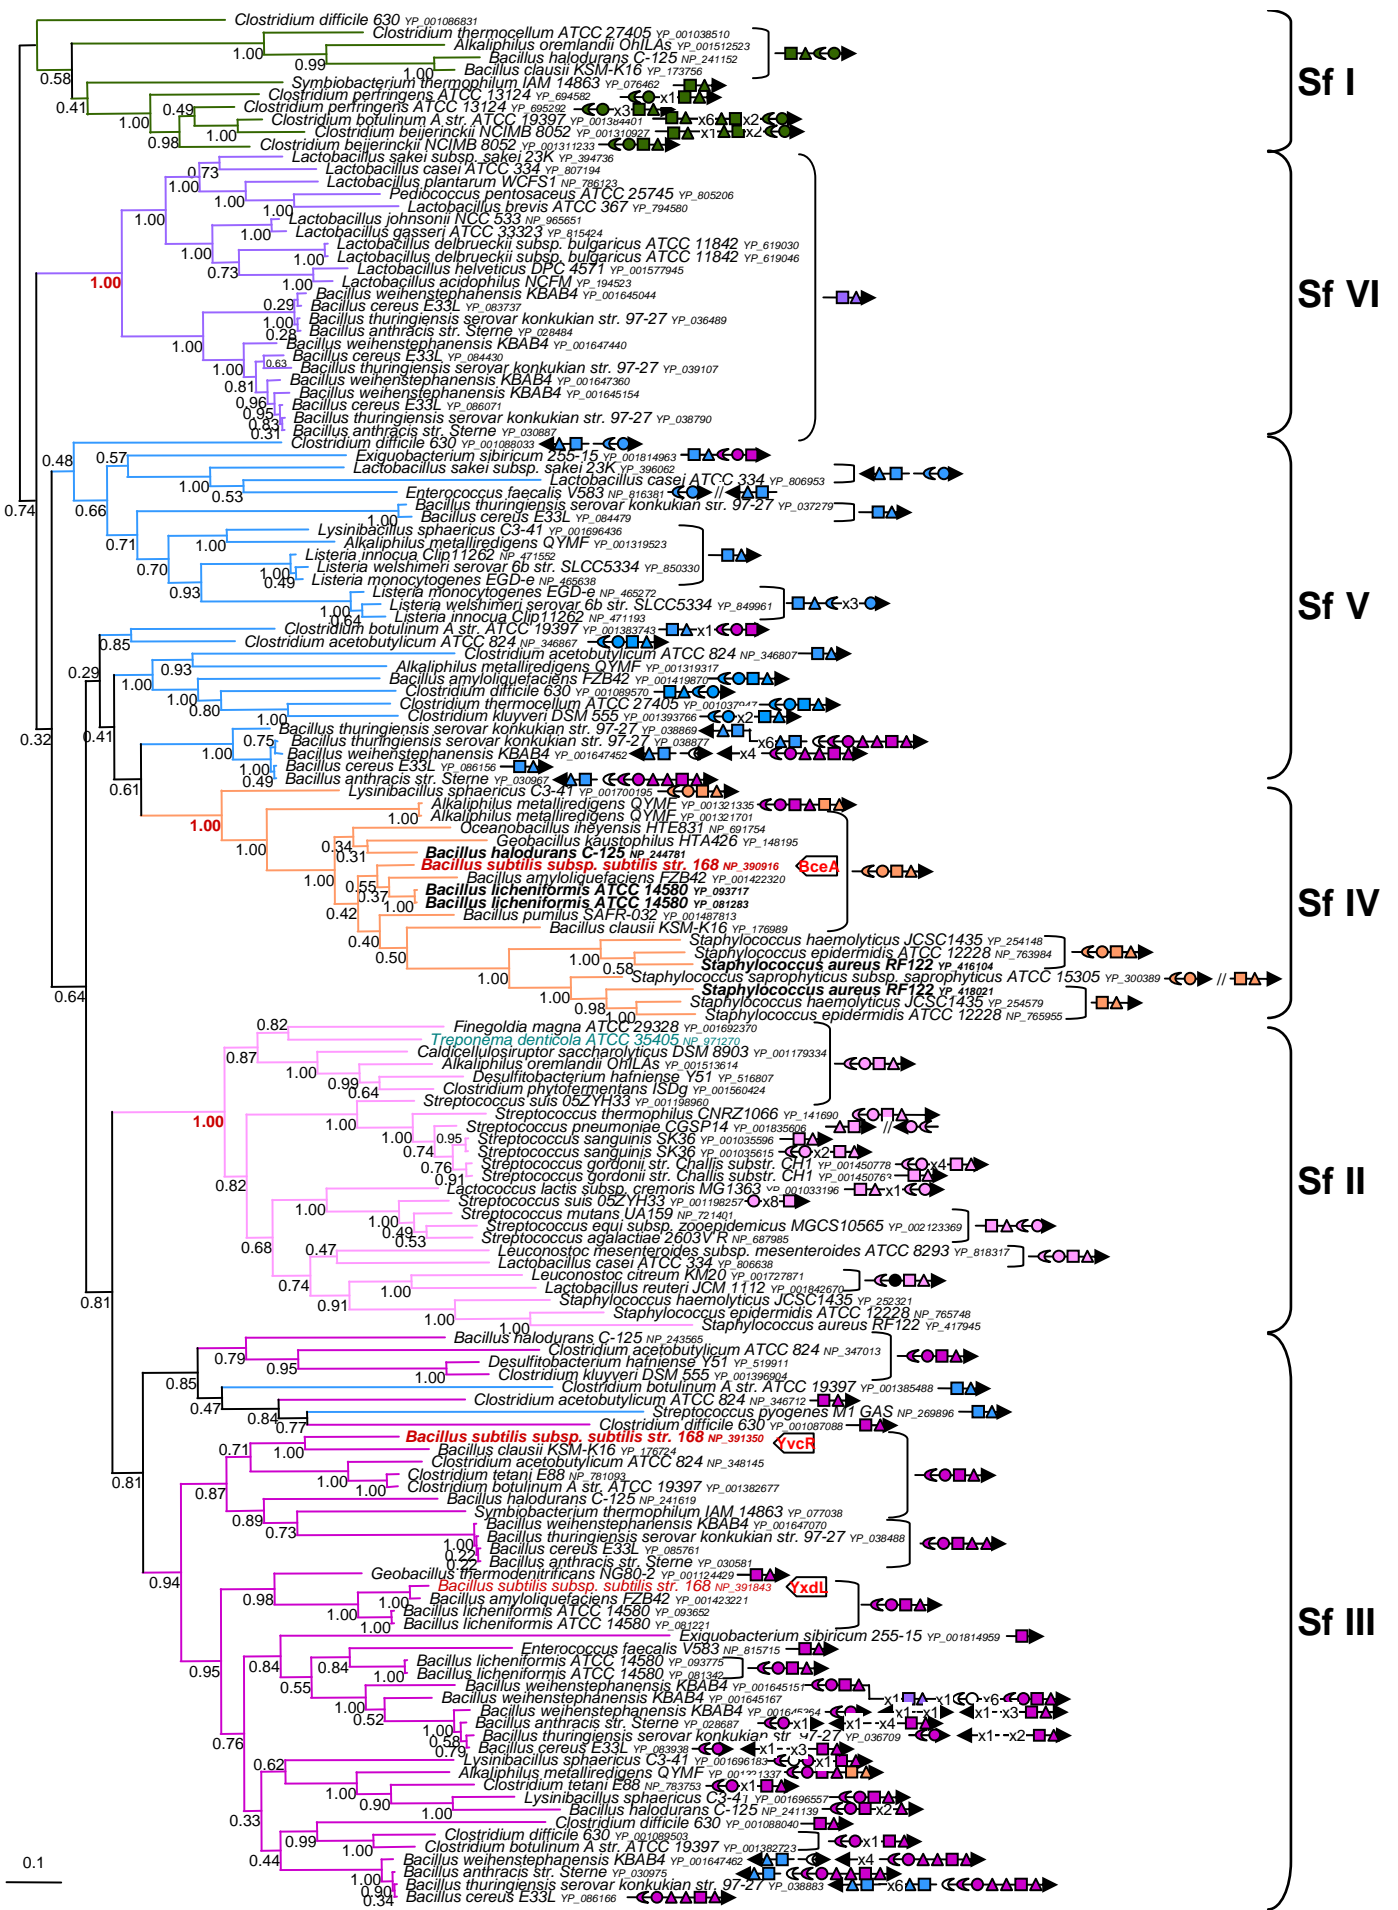

Supplement: pone.0015951.s004.pdf [file pone.0015951.s004.pdf]
