# Supplementary material for: A New Highly Conserved Antibiotic Sensing/Resistance Pathway in Firmicutes Involves an ABC Transporter Interplaying with a Signal Transduction System
Source: PubMed Central journal article supplement (PMC3023708; doi:10.1371/journal.pone.0015951), 2011-01-19
Supplement: pone.0015951.s009.pdf [file pone.0015951.s009.pdf]

| Strains                                             | Genotype                                                                                                                     | Antibiotic resistance                               | Origin                                 |
|-----------------------------------------------------|------------------------------------------------------------------------------------------------------------------------------|-----------------------------------------------------|----------------------------------------|
| <i>Escherichia coli</i> DH5 $\alpha$                | F- 80 <i>lacZ</i> M15 ( <i>lacZYA-argF</i> )U169<br><i>deoR recA1 endA1 hsdR17 phoA supE44</i><br><i>-thi-1 gyrA96 relA1</i> |                                                     | In vitrogen                            |
| <i>B. licheniformis</i> DSM 13<br>(ATCC 14580)      |                                                                                                                              |                                                     | DSMZ                                   |
| <i>B. halodurans</i> DSM 18197<br>(ATCC BAA-125)    |                                                                                                                              |                                                     | DSMZ                                   |
| <i>Bacillus subtilis</i> 168                        | <i>trpC2</i>                                                                                                                 |                                                     | Anagnostopoulos and Spizizen 1961      |
| BSmrs 111 ( <b>168, pDGbceR</b> )<br><b>BSGY005</b> | 168, pDGbceR<br>168, <i>amyE::PbceA::lacZ</i>                                                                                | Km <sup>r</sup><br>Cm <sup>r</sup>                  | Joseph et al. 2002<br>Ohki et al. 2003 |
| BSmrs 203 ( <b>pDGbceR</b> )                        | BSGY005, pDGbceR                                                                                                             | Cm <sup>r</sup> , Km <sup>r</sup>                   | This work                              |
| BSmrs 293 ( $\Delta$ <b>bceAB</b> )                 | BSGY005, <i>PbceA::spc::yttA</i>                                                                                             | Sp <sup>c</sup> , Cm <sup>r</sup>                   | This work                              |
| BSmrs 297 ( $\Delta$ <b>bceAB, pDGbceR</b> )        | 293, pDG148bceR                                                                                                              | Sp <sup>c</sup> , Cm <sup>r</sup> , Km <sup>r</sup> | This work                              |
| BSmrs 294 ( <b>bceABBS<sub>ri</sub></b> )           | BSGY005, <i>PbceA::his6-bceABBS::yttA</i>                                                                                    | Tc <sup>r</sup> , Cm <sup>r</sup>                   | This work                              |
| BSmrs 298 ( <b>bceABBS<sub>ri</sub>, pDGbceR</b> )  | 294, pDGbceR                                                                                                                 | Tc <sup>r</sup> , Cm <sup>r</sup> , Km <sup>r</sup> | This work                              |
| BSmrs 313 ( <b>ytsCDBL<sub>ri</sub></b> )           | BSGY005, <i>PbceA::his6-ytsCDBL::yttA</i>                                                                                    | Tc <sup>r</sup> , Cm <sup>r</sup>                   | This work                              |
| BSmrs 318 ( <b>ytsCDBL<sub>ri</sub>, pDGbceR</b> )  | 313, pDGbceR                                                                                                                 | Tc <sup>r</sup> , Cm <sup>r</sup> , Km <sup>r</sup> | This work                              |
| BSmrs 312 ( <b>bceABBS<sub>ri</sub></b> )           | BSGY005, <i>PbceA::his6-bceABBS::yttA</i>                                                                                    | Tc <sup>r</sup> , Cm <sup>r</sup>                   | This work                              |
| BSmrs 317 ( <b>bceABBS<sub>ri</sub>, pDGbceR</b> )  | 312, pDGbceR                                                                                                                 | Tc <sup>r</sup> , Cm <sup>r</sup> , Km <sup>r</sup> | This work                              |
| Bsmrs 357 ( <b>vraDESa<sub>ri</sub></b> )           | BSGY005, <i>PbceA::his6-vraDESa::yttA</i>                                                                                    | Tc <sup>r</sup> , Cm <sup>r</sup>                   | This work                              |
| Bsmrs 361 ( <b>vraDESa<sub>ri</sub>, pDGbceR</b> )  | 357, pDGbceR                                                                                                                 | Tc <sup>r</sup> , Cm <sup>r</sup> , Km <sup>r</sup> | This work                              |
| Bsmrs 358 ( <b>vraFGSa<sub>ri</sub></b> )           | BSGY005, <i>PbceA::his6-vraFGSa::yttA</i>                                                                                    | Tc <sup>r</sup> , Cm <sup>r</sup>                   | This work                              |
| Bsmrs 362 ( <b>vraFGSa<sub>ri</sub>, pDGbceR</b> )  | 358, pDGbceR                                                                                                                 | Tc <sup>r</sup> , Cm <sup>r</sup> , Km <sup>r</sup> | This work                              |
| BSmrs 295 ( <b>bceBBS<math>\Delta</math>loop</b> )  | BSGY005, <i>PbceA::his6-bceBBS<math>\Delta</math>loop::yttA</i>                                                              | Tc <sup>r</sup> , Cm <sup>r</sup>                   | This work                              |

|                                                                                                     |                                                                                            |                                                     |           |
|-----------------------------------------------------------------------------------------------------|--------------------------------------------------------------------------------------------|-----------------------------------------------------|-----------|
| Bsmrs 299 ( <b><i>bceBBs</i></b> $\Delta$ loop, pDG <b><i>bceR</i></b> )                            | 295, pDG <b><i>bceR</i></b>                                                                | Tc <sup>r</sup> , Cm <sup>r</sup> , Km <sup>r</sup> | This work |
| Bsmrs 336 ( <b><i>ytsDBI</i></b> $\Delta$ loop)                                                     | BSGY005, <i>PbceA::his6-ytsCDBI</i> $\Delta$ loop:: <i>yttA</i>                            |                                                     |           |
| Bsmrs 337 ( <b><i>ytsDBI</i></b> $\Delta$ loop, pDG <b><i>bceR</i></b> )                            | 336, pDG <b><i>bceR</i></b>                                                                |                                                     |           |
| Bsmrs 296 ( <b><i>bceB</i></b> loop <b><i>BceBBs</i></b> <sub>ri</sub> )                            | BSGY005, <i>PbceA::his6-bceABBs</i> loop <b><i>BceBBs</i></b> <sub>ri</sub> :: <i>yttA</i> | Tc <sup>r</sup> , Cm <sup>r</sup>                   | This work |
| Bsmrs 300 ( <b><i>bceB</i></b> loop <b><i>BceBBs</i></b> <sub>ri</sub> , pDG <b><i>bceR</i></b> )   | 296, pDG <b><i>bceR</i></b>                                                                | Tc <sup>r</sup> , Cm <sup>r</sup> , Km <sup>r</sup> | This work |
| Bsmrs 315 ( <b><i>bceBBs</i></b> loop <b><i>YtsDBI</i></b> <sub>ri</sub> )                          | BSGY005, <i>PbceA::his6-bceABBs</i> loop <b><i>YtsDBI</i></b> <sub>ri</sub> :: <i>yttA</i> | Tc <sup>r</sup> , Cm <sup>r</sup>                   | This work |
| Bsmrs 320 ( <b><i>bceBBs</i></b> loop <b><i>YtsDBI</i></b> <sub>ri</sub> , pDG <b><i>bceR</i></b> ) | 315, pDG <b><i>bceR</i></b>                                                                | Tc <sup>r</sup> , Cm <sup>r</sup> , Km <sup>r</sup> | This work |
| Bsmrs 314 ( <b><i>bceBBs</i></b> loop <b><i>BceBBh</i></b> <sub>ri</sub> )                          | BSGY005, <i>PbceA::his6-bceABBs</i> loop <b><i>BceBBh</i></b> <sub>ri</sub> :: <i>yttA</i> | Tc <sup>r</sup> , Cm <sup>r</sup>                   | This work |
| Bsmrs 319 ( <b><i>bceBBs</i></b> loop <b><i>BceBBh</i></b> <sub>ri</sub> , pDG <b><i>bceR</i></b> ) | 314, pDG <b><i>bceR</i></b>                                                                | Tc <sup>r</sup> , Cm <sup>r</sup> , Km <sup>r</sup> | This work |
| Bsmrs 316 ( <b><i>bceBBs</i></b> loop <b><i>YvcSBs</i></b> <sub>ri</sub> )                          | BSGY005, <i>PbceA::his6-bceABBs</i> loop <b><i>YvcSBs</i></b> <sub>ri</sub> :: <i>yttA</i> | Tc <sup>r</sup> , Cm <sup>r</sup>                   | This work |
| Bsmrs 321 ( <b><i>bceBBs</i></b> loop <b><i>YvcSBs</i></b> <sub>ri</sub> , pDG <b><i>bceR</i></b> ) | 316, pDG <b><i>bceR</i></b>                                                                | Tc <sup>r</sup> , Cm <sup>r</sup> , Km <sup>r</sup> | This work |

To facilitate understanding strain names, indicated in bold characters, are used throughout the text and tables.

Anagnostopoulos C, Spizizen J. 1961. Requirements for transformation in *Bacillus subtilis*. J Bacteriol **81**: 741-746.

Joseph P, Fichant G, Quentin Y, Denizot F. 2002. Regulatory relationship of two-component and ABC transport systems and clustering of their genes in the *bacillus/clostridium* group, suggest a functional link between them. J Mol Microbiol Biotechnol **4**: 503-513.

Ohki R, Giyanto, Tateno K, Masuyama W, Moriya S, Kobayashi K, Ogasawara N. 2003. The BceRS two-component regulatory system induces expression of the bacitracin transporter, BceAB, in *Bacillus subtilis*. Mol Microbiol **49**: 1135-1144.
