# Supplementary material for: A New Highly Conserved Antibiotic Sensing/Resistance Pathway in Firmicutes Involves an ABC Transporter Interplaying with a Signal Transduction System
Source: PubMed Central journal article supplement (PMC3023708; doi:10.1371/journal.pone.0015951), 2011-01-19
Supplement: pone.0015951.s010.pdf [file pone.0015951.s010.pdf]

| Plasmids                         | Features, resistance                                                     | Références         |
|----------------------------------|--------------------------------------------------------------------------|--------------------|
| pDG <i>bceR</i>                  | IPTG inducible <i>bceR</i> expression, Ap <sup>r</sup> , Km <sup>r</sup> | Joseph et al. 2002 |
| pbSy                             | Ap <sup>r</sup> , Spc <sup>r</sup>                                       | This work          |
| pbTy                             | Ap <sup>r</sup> , Tc <sup>r</sup>                                        | This work          |
| pbTy <i>bceAB</i>                | Ap <sup>r</sup> , Tc <sup>r</sup>                                        | This work          |
| pbTy <i>ytsCDBI</i>              | Ap <sup>r</sup> , Tc <sup>r</sup>                                        | This work          |
| pbTy <i>bceABBh</i>              | Ap <sup>r</sup> , Tc <sup>r</sup>                                        | This work          |
| pbTy <i>vraDESa</i>              | Ap <sup>r</sup> , Tc <sup>r</sup>                                        | This work          |
| pbTy <i>vraFGSa</i>              | Ap <sup>r</sup> , Tc <sup>r</sup>                                        | This work          |
| pbTy <i>bceABBs</i> Δloop        | Ap <sup>r</sup> , Tc <sup>r</sup>                                        | This work          |
| pbTy <i>ytsCDBI</i> Δloop        | Ap <sup>r</sup> , Tc <sup>r</sup>                                        | This work          |
| pbTy <i>bceA, bceBloopBceBBs</i> | Ap <sup>r</sup> , Tc <sup>r</sup>                                        | This work          |
| pbTy <i>bceA, bceBloopYtsDBI</i> | Ap <sup>r</sup> , Tc <sup>r</sup>                                        | This work          |
| pbTy <i>bceA, bceBloopBceBBh</i> | Ap <sup>r</sup> , Tc <sup>r</sup>                                        | This work          |
| pbTy <i>bceA, bceBloopYvcSBs</i> | Ap <sup>r</sup> , Tc <sup>r</sup>                                        | This work          |

Joseph P, Fichant G, Quentin Y, Denizot F. 2002. Regulatory relationship of two-component and ABC transport systems and clustering of their genes in the *bacillus/clostridium* group, suggest a functional link between them. *J Mol Microbiol Biotechnol* 4: 503-513.
