# Supplementary material for: A New Highly Conserved Antibiotic Sensing/Resistance Pathway in Firmicutes Involves an ABC Transporter Interplaying with a Signal Transduction System
Source: PubMed Central journal article supplement (PMC3023708; doi:10.1371/journal.pone.0015951), 2011-01-19
Supplement: pone.0015951.s011.pdf [file pone.0015951.s011.pdf]

| Name             | Sequence                                                  |
|------------------|-----------------------------------------------------------|
| Pbcea1           | 5'-GGGCATTGATCCAAAAGATGTACC-3'                            |
| Pbcea2-pml       | 5'-CGCCC ACGTGATGATGATGATGGTGCATTTACGCAG TCTCCTTTAATTG-3' |
| Tet1-asc         | 5'-TCATCATCATCACGTGGGCGCGCCAATGGTGCAGGT TGTTCTCAATG-3'    |
| Tet2-lin         | 5'-AGGATCAATTTTGA ACTCTCTCCC-3'                           |
| yttA1-tet        | 5'-GGGAGAGAGTTCAAAAATTGATCCTGAAGGTCATT AAATCGTCGTTGTG-3'  |
| yttA2            | 5'-AGAAGATGCAAAAACGGCAAAGG-3'                             |
| spec-asc         | 5'-TGGCGCGCCGATTTTCGTTTCGTGAATACATG-3'                    |
| spec-bst         | 5'-ACAGGTTACCACCAATTAGAATGAATATTTCCC-3'                   |
| bceABBs-pml      | 5'-GTGATTTTAGAAGCGAATAAAAATTCG-3'                         |
| bceABBs-asc      | 5'-TTGGCGCGCCAGGAAGCAGAAACGGCATCTACC-3'                   |
| ytsCDBl-pml      | 5'-ATGATTTTAGAAGCGAAAAAATACG-3'                           |
| ytsCDBl-pml      | 5'-TTGGCGCGCCGTCCGATGGGCTTTTGATTATGC-3'                   |
| bceABbh-pml      | 5'-GCAATACTTGAAGCGACAAACATTC-3'                           |
| bceABbh-asc      | 5'-TTGGCGCGCCTTTAAGTGAAGAGCAGCGGCAAC-3'                   |
| loop1/FseBbv     | 5'-GCTGAGGACAATGAGGCCGGCCGAGTAATACGA GATGTAAGCAAG-3'      |
| loop2/FseBbv     | 5'-GCCGGCCTCATTGTCCTCAGCTCACTGTTTGGTAT GGTGATGTTC-3'      |
| loop-BceBBs_fse  | 5'-TCGGCCGGCCTTTCGGAAAAGACCGCTGAACAAAAT G-3'              |
| loop-BceBBs_bbv  | 5'-GAGCTGAGGACTTTTTGCGCAGCGCTTGTATCTAG-3'                 |
| loop-ytsD-BI_fse | 5'-TCGGCCGGCCTTGCAGAGAAAACCGCCGAACAAAAC-3'                |
| loop-ytsD-BI_bbv | 5'-GAGCTGAGGACTTTTTGAGCTGTGCTTGCATCAAG-3'                 |
| loop-BceBBh_fse  | 5'-TCGGCCGGCCTTGCGGAAAAACAGCGGAACATTATG-3'                |
| loop-BceBBh_bbv  | 5'-GAGCTGAGGACCTTCTGACTTTGGCTCATTTC AAC-3'                |
| vraFG_PmlI       | 5'-CACAAGAAGTGTTGCGAGATATC-3'                             |
| vraFG_AscI       | 5'-TTGGCGCGCCGCTTCCAGTATAGTTCGTGAATCC-3'                  |
| vraDE_PmlI       | 5'-ACGATATTATCAGTGCAACATGTTTC-3'                          |
| vraDE_AscI       | 5'-TTGGCGCGCCGCAATGACGTTATACCAAGTTACAGTC-3'               |
